# Supplementary material for: What is the stability of additional organic carbon stored thanks to alternative cropping systems and organic waste product application? A multi-method evaluation
Source: Copernicus journal article supplement (doi:10.5194/soil-10-533-2024), 2024-08-08

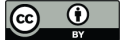

*Supplement of*

**What is the stability of additional organic carbon stored thanks to alternative cropping systems and organic waste product application? A multi-method evaluation**

**Tchodjowiè P. I. Kpemoua et al.**

*Correspondence to:* Claire Chenu ([claire.chenu@inrae.fr](mailto:claire.chenu@inrae.fr))

The copyright of individual parts of the supplement might differ from the article licence.

**Table. S1:** Mass and C distribution in size and density fractions after 21 years of organic wastes products (OWPs) application. Mean  $\pm$  standard deviation of 4 replicates. Soils were sampled in all treatments with application of municipal solid waste (MSW) compost, biowaste compost (BIOW), farmyard manure (FYM), and the control without organic input (CON-QA). The different letters indicate significant differences between treatments at the 5%.

| Mass fraction (g.kg <sup>-1</sup> Bulk soil)                  |                    |                    |                       |                     |                    |                    |                    |                     |                   |
|---------------------------------------------------------------|--------------------|--------------------|-----------------------|---------------------|--------------------|--------------------|--------------------|---------------------|-------------------|
| Treatment                                                     | Bulk soil          | cPOM               | fPOM                  | cSand               | fSand              | csilt              | fSilt              | Clay                | Recovery (%)      |
| CON-QA                                                        |                    | 2.73 $\pm$ 1.16 b  | 6.26 $\pm$ 0.75 b     | 8.36 $\pm$ 1.66 c   | 74.21 $\pm$ 11.05  | 441.3 $\pm$ 16.38  | 255.79 $\pm$ 7.26  | 211.34 $\pm$ 24.46  | 94.32 $\pm$ 1.17  |
| MSW                                                           |                    | 2.86 $\pm$ 0.19 b  | 10.13 $\pm$ 2.60 a    | 29.51 $\pm$ 20.73 b | 75.35 $\pm$ 8.96   | 425.79 $\pm$ 7.59  | 240.46 $\pm$ 25.51 | 215.90 $\pm$ 20.90  | 92.63 $\pm$ 1.43  |
| FYM                                                           |                    | 2.76 $\pm$ 0.53 b  | 13.22 $\pm$ 1.33 a    | 13.18 $\pm$ 1.56 b  | 79.66 $\pm$ 11.69  | 434.48 $\pm$ 8.88  | 211.25 $\pm$ 40.83 | 245.45 $\pm$ 30.23  | 93.45 $\pm$ 1.13  |
| BIOW                                                          |                    | 3.90 $\pm$ 0.89 a  | 10.77 $\pm$ 1.56 a    | 22.04 $\pm$ 4.48 a  | 74.82 $\pm$ 3.69   | 437.65 $\pm$ 21.41 | 212.86 $\pm$ 36.01 | 237.96 $\pm$ 46.04  | 93.87 $\pm$ 1.74  |
|                                                               | ANOVA              | <b>P&lt;0.05</b>   | <b>P&lt;0.05</b>      | <b>P&lt;0.05</b>    | <b>P&gt;0.05</b>   | <b>P&gt;0.05</b>   | <b>P&gt;0.05</b>   | <b>P&gt;0.05</b>    | <b>P&gt;0.05</b>  |
| Carbon content in fraction (g C. kg <sup>-1</sup> fraction)   |                    |                    |                       |                     |                    |                    |                    |                     |                   |
| CON-QA                                                        |                    | 374.21 $\pm$ 30.87 | 166.38 $\pm$ 31.41 bc | 5.14 $\pm$ 0.75 c   | 0.81 $\pm$ 0.14 a  | 1.07 $\pm$ 0.14 c  | 0.83 $\pm$ 0.15    | 30.55 $\pm$ 1.15 bc |                   |
| MSW                                                           |                    | 384.17 $\pm$ 63.40 | 177.21 $\pm$ 32.61 b  | 7.38 $\pm$ 0.59 b   | 0.54 $\pm$ 0.30 ab | 1.35 $\pm$ 0.09 b  | 1.04 $\pm$ 0.36    | 36.44 $\pm$ 2.48 ab |                   |
| FYM                                                           |                    | 383.91 $\pm$ 53.51 | 184.95 $\pm$ 15.36 ab | 11.14 $\pm$ 1.14 b  | 0.60 $\pm$ 0.20 ab | 1.41 $\pm$ 0.07 b  | 1.44 $\pm$ 0.84    | 35.03 $\pm$ 5.25 ab |                   |
| BIOW                                                          |                    | 391.03 $\pm$ 4.17  | 219.02 $\pm$ 19.21 a  | 19.60 $\pm$ 2.65 a  | 0.84 $\pm$ 0.09 a  | 1.95 $\pm$ 0.34 a  | 1.25 $\pm$ 0.32    | 40.21 $\pm$ 6.59 a  |                   |
|                                                               | ANOVA              | <b>P&gt;0.05</b>   | <b>P&lt;0.05</b>      | <b>P&lt;0.05</b>    | <b>P&lt;0.05</b>   | <b>P&lt;0.05</b>   | <b>P&gt;0.05</b>   | <b>P&lt;0.05</b>    |                   |
| Carbon content in Bulk soil (g C. kg <sup>-1</sup> Bulk soil) |                    |                    |                       |                     |                    |                    |                    |                     |                   |
| CON-QA                                                        | 9.92 $\pm$ 0.63 c  | 1.03 $\pm$ 0.48 bc | 1.02 $\pm$ 0.09 c     | 0.04 $\pm$ 0.01 c   | 0.06 $\pm$ 0.02    | 0.47 $\pm$ 0.06 cd | 0.21 $\pm$ 0.04    | 7.13 $\pm$ 0.60 c   | 111.18 $\pm$ 9.41 |
| MSW                                                           | 13.84 $\pm$ 0.16 b | 1.10 $\pm$ 0.21 ab | 1.73 $\pm$ 0.21 b     | 0.21 $\pm$ 0.15 b   | 0.04 $\pm$ 0.02    | 0.58 $\pm$ 0.04 bc | 0.25 $\pm$ 0.11    | 8.49 $\pm$ 0.35 b   | 93.92 $\pm$ 3.17  |
| FYM                                                           | 13.91 $\pm$ 0.37 b | 1.08 $\pm$ 0.35 ab | 2.43 $\pm$ 0.13 a     | 0.15 $\pm$ 0.03 b   | 0.05 $\pm$ 0.02    | 0.61 $\pm$ 0.04 bc | 0.29 $\pm$ 0.16    | 9.17 $\pm$ 0.94 ab  | 103.94 $\pm$ 9.33 |
| BIOW                                                          | 16.04 $\pm$ 0.68 a | 1.53 $\pm$ 0.35 a  | 2.34 $\pm$ 0.21 a     | 0.44 $\pm$ 0.14 a   | 0.06 $\pm$ 0.009   | 0.85 $\pm$ 0.14 a  | 0.26 $\pm$ 0.05    | 10.12 $\pm$ 0.78 a  | 102.16 $\pm$ 5.79 |
|                                                               | ANOVA              | <b>P&lt;0.05</b>   | <b>P&lt;0.05</b>      | <b>P&lt;0.05</b>    | <b>P&lt;0.05</b>   | <b>P&gt;0.05</b>   | <b>P&lt;0.05</b>   | <b>P&gt;0.05</b>    | <b>P&gt;0.05</b>  |
| Distribution of total C within the fractions (%)              |                    |                    |                       |                     |                    |                    |                    |                     |                   |
| CON-QA                                                        |                    | 10.25 $\pm$ 4.55   | 10.29 $\pm$ 1.08      | 0.43 $\pm$ 0.11     | 0.68 $\pm$ 0.12    | 4.72 $\pm$ 0.57    | 2.14 $\pm$ 0.41    | 71.49 $\pm$ 5.03    |                   |
| MSW                                                           |                    | 8.87 $\pm$ 1.66    | 13.98 $\pm$ 1.73      | 1.73 $\pm$ 1.21     | 0.34 $\pm$ 0.38    | 4.64 $\pm$ 0.36    | 2.03 $\pm$ 0.88    | 68.40 $\pm$ 2.39    |                   |
| FYM                                                           |                    | 7.84 $\pm$ 2.56    | 17.65 $\pm$ 1.60      | 1.06 $\pm$ 0.17     | 0.65 $\pm$ 0.32    | 4.45 $\pm$ 0.37    | 2.09 $\pm$ 0.97    | 66.25 $\pm$ 2.63    |                   |
| BIOW                                                          |                    | 9.75 $\pm$ 2.11    | 15.00 $\pm$ 1.80      | 2.79 $\pm$ 0.82     | 0.69 $\pm$ 0.20    | 5.44 $\pm$ 0.80    | 1.66 $\pm$ 0.31    | 64.66 $\pm$ 2.60    |                   |

**Table. S2:** Mass and C distribution in size and density fractions. Mean  $\pm$  standard deviation of 4 replicates. Soils were sampled in conservation agriculture (CA), organic agriculture (ORG) and conventional agriculture (CON-LC). The different letters indicate significant differences between treatments at the 5%.

| Mass fraction (g.kg <sup>-1</sup> Bulk soil)                  |                    |                    |                       |                   |                    |                    |                    |                    |                   |
|---------------------------------------------------------------|--------------------|--------------------|-----------------------|-------------------|--------------------|--------------------|--------------------|--------------------|-------------------|
| Treatment                                                     | Bulk soil          | cPOM               | fPOM                  | cSand             | fSand              | csilt              | fSilt              | Clay               | Recovery (%)      |
| CON-LC                                                        |                    | 1.86 $\pm$ 0.60    | 5.34 $\pm$ 0.84 b     | 33.22 $\pm$ 4.64  | 210.39 $\pm$ 16.89 | 352.64 $\pm$ 19.36 | 193.97 $\pm$ 40.64 | 202.99 $\pm$ 18.91 | 94.83 $\pm$ 2.58  |
| ORG                                                           |                    | 2.35 $\pm$ 0.21    | 6.39 $\pm$ 1.17 ab    | 35.04 $\pm$ 2.60  | 220.86 $\pm$ 9.53  | 349.21 $\pm$ 10.36 | 156.30 $\pm$ 13.03 | 229.84 $\pm$ 18.62 | 94.48 $\pm$ 1.24  |
| CA                                                            |                    | 2.62 $\pm$ 0.59    | 8.79 $\pm$ 2.19 a     | 98.68 $\pm$ 68.58 | 249.02 $\pm$ 69.79 | 272.11 $\pm$ 90.61 | 132.68 $\pm$ 38.67 | 236.11 $\pm$ 25.75 | 95.63 $\pm$ 2.24  |
|                                                               | ANOVA              | <b>P&gt;0.05</b>   | <b>P&lt;0.05</b>      | <b>P&gt;0.05</b>  | <b>P&gt;0.05</b>   | <b>P&gt;0.05</b>   | <b>P&gt;0.05</b>   | <b>P&gt;0.05</b>   | <b>P&gt;0.05</b>  |
| Carbon content in fraction (g C. kg <sup>-1</sup> fraction)   |                    |                    |                       |                   |                    |                    |                    |                    |                   |
| CON-LC                                                        |                    | 295.37 $\pm$ 98.31 | 123.87 $\pm$ 82.27 b  | 1.46 $\pm$ 0.17   | 0.33 $\pm$ 0.14    | 0.73 $\pm$ 0.20 b  | 1.09 $\pm$ 0.25b   | 11.12 $\pm$ 1.49 c |                   |
| ORG                                                           |                    | 324.38 $\pm$ 18.76 | 173.77 $\pm$ 40.93 a  | 1.93 $\pm$ 0.68   | 0.48 $\pm$ 0.09    | 1.43 $\pm$ 0.23 ab | 4.39 $\pm$ 2.21a   | 26.83 $\pm$ 1.67 b |                   |
| CA                                                            |                    | 309.20 $\pm$ 37.10 | 160.01 $\pm$ 28.51 ab | 2.14 $\pm$ 2.16   | 0.40 $\pm$ 0.12    | 2.31 $\pm$ 0.91 a  | 5.09 $\pm$ 4.35a   | 35.66 $\pm$ 4.05 a |                   |
|                                                               | ANOVA              | <b>P&gt;0.05</b>   | <b>P&lt;0.05</b>      | <b>P&gt;0.05</b>  | <b>P&gt;0.05</b>   | <b>P&lt;0.05</b>   | <b>P&lt;0.05</b>   | <b>P&lt;0.05</b>   |                   |
| Carbon content in Bulk soil (g C. kg <sup>-1</sup> Bulk soil) |                    |                    |                       |                   |                    |                    |                    |                    |                   |
| CON-LC                                                        | 9.82 $\pm$ 0.48 b  | 0.72 $\pm$ 0.30    | 1.00 $\pm$ 0.09 b     | 0.08 $\pm$ 0.05   | 0.10 $\pm$ 0.03    | 0.47 $\pm$ 0.07    | 0.55 $\pm$ 0.38    | 6.42 $\pm$ 0.71 b  | 102.05 $\pm$ 4.61 |
| ORG                                                           | 10.39 $\pm$ 0.42 b | 0.76 $\pm$ 0.05    | 1.08 $\pm$ 0.08 b     | 0.07 $\pm$ 0.03   | 0.10 $\pm$ 0.02    | 0.50 $\pm$ 0.07    | 0.67 $\pm$ 0.29    | 6.74 $\pm$ 0.51 b  | 101.15 $\pm$ 6.47 |
| CA                                                            | 13.30 $\pm$ 1.05 a | 0.82 $\pm$ 0.28    | 1.36 $\pm$ 0.16 a     | 0.11 $\pm$ 0.03   | 0.10 $\pm$ 0.04    | 0.57 $\pm$ 0.05    | 0.63 $\pm$ 0.03    | 9.02 $\pm$ 1.05 a  | 99.31 $\pm$ 6.40  |
|                                                               | ANOVA              | <b>P&lt;0.05</b>   | <b>P&gt;0.05</b>      | <b>P&lt;0.05</b>  | <b>P&gt;0.05</b>   | <b>P&gt;0.05</b>   | <b>P&gt;0.05</b>   | <b>P&lt;0.05</b>   | <b>P&gt;0.05</b>  |
| Distribution of total C within the fractions (%)              |                    |                    |                       |                   |                    |                    |                    |                    |                   |
| CON-LC                                                        |                    | 7.11 $\pm$ 2.87    | 10.03 $\pm$ 1.10      | 0.80 $\pm$ 0.52   | 0.94 $\pm$ 0.21    | 4.64 $\pm$ 0.27    | 6.31 $\pm$ 0.48    | 64.01 $\pm$ 3.26   |                   |
| ORG                                                           |                    | 7.25 $\pm$ 0.43    | 10.25 $\pm$ 0.44      | 0.64 $\pm$ 0.25   | 1.00 $\pm$ 0.18    | 4.73 $\pm$ 0.60    | 6.31 $\pm$ 2.38    | 64.23 $\pm$ 3.12   |                   |
| CA                                                            |                    | 6.19 $\pm$ 1.80    | 10.35 $\pm$ 1.33      | 0.87 $\pm$ 0.19   | 0.74 $\pm$ 0.27    | 4.32 $\pm$ 0.31    | 4.15 $\pm$ 2.73    | 68.40 $\pm$ 0.95   |                   |

**Table. S3:** Carbon stock and additional carbon stock distribution in size and density fractions. Mean  $\pm$  standard deviation of 4 replicates. Soils were sampled in all treatments with application of municipal solid waste (MSW) compost, biowaste compost (BIOW), farmyard manure (FYM), and the control without organic input (CON-QA).

| Carbon stock (t C. ha <sup>-1</sup> )            |                  |                 |                 |                 |                  |                 |                 |                  |
|--------------------------------------------------|------------------|-----------------|-----------------|-----------------|------------------|-----------------|-----------------|------------------|
|                                                  | Bulk soil        | cPOM            | fPOM            | cSand           | fSand            | csilt           | fSilt           | Clay             |
| CON-QA                                           | 39.31 $\pm$ 2.49 | 4.02 $\pm$ 1.73 | 4.04 $\pm$ 0.43 | 0.17 $\pm$ 0.04 | 0.24 $\pm$ 0.07  | 1.85 $\pm$ 0.23 | 0.84 $\pm$ 0.15 | 28.14 $\pm$ 2.80 |
| MSW                                              | 54.03 $\pm$ 0.59 | 4.79 $\pm$ 0.91 | 7.55 $\pm$ 0.88 | 0.93 $\pm$ 0.65 | 0.17 $\pm$ 0.09  | 2.51 $\pm$ 0.17 | 1.09 $\pm$ 0.48 | 36.98 $\pm$ 1.53 |
| FYM                                              | 54.77 $\pm$ 1.39 | 4.33 $\pm$ 1.52 | 9.71 $\pm$ 1.02 | 0.58 $\pm$ 0.10 | 0.19 $\pm$ 0.07  | 2.45 $\pm$ 0.19 | 1.14 $\pm$ 0.50 | 36.37 $\pm$ 0.52 |
| BIOW                                             | 63.17 $\pm$ 2.56 | 6.15 $\pm$ 1.14 | 9.48 $\pm$ 0.98 | 1.77 $\pm$ 0.53 | 0.25 $\pm$ 0.03  | 3.44 $\pm$ 0.50 | 1.05 $\pm$ 0.16 | 41.02 $\pm$ 3.41 |
| Additional Carbon stock (t C. ha <sup>-1</sup> ) |                  |                 |                 |                 |                  |                 |                 |                  |
| MSW                                              | 14.72 $\pm$ 1.28 | 0.77 $\pm$ 0.98 | 3.51 $\pm$ 0.49 | 0.76 $\pm$ 0.33 | -0.07 $\pm$ 0.06 | 0.65 $\pm$ 0.14 | 0.26 $\pm$ 0.25 | 8.84 $\pm$ 1.60  |
| FYM                                              | 15.46 $\pm$ 1.43 | 0.31 $\pm$ 1.15 | 5.66 $\pm$ 0.56 | 0.42 $\pm$ 0.06 | -0.05 $\pm$ 0.05 | 0.59 $\pm$ 0.15 | 0.30 $\pm$ 0.26 | 8.23 $\pm$ 1.42  |
| BIOW                                             | 23.86 $\pm$ 1.79 | 2.12 $\pm$ 1.04 | 5.44 $\pm$ 0.54 | 1.60 $\pm$ 0.26 | 0.01 $\pm$ 0.04  | 1.59 $\pm$ 0.28 | 0.21 $\pm$ 0.11 | 12.88 $\pm$ 2.21 |

**Table. S4:** Carbon stock and additional carbon stock distribution in size and density fractions. Mean  $\pm$  standard deviation of 4 replicates. Soils were sampled in conservation agriculture (CA), organic agriculture (ORG) and conventional agriculture (CON-LC).

| Carbon stock (t C. ha <sup>-1</sup> )            |                  |                 |                 |                  |                 |                 |                  |                  |
|--------------------------------------------------|------------------|-----------------|-----------------|------------------|-----------------|-----------------|------------------|------------------|
|                                                  | Bulk soil        | cPOM            | fPOM            | cSand            | fSand           | csilt           | fSilt            | Clay             |
| CON-LC                                           | 42.21 $\pm$ 2.07 | 3.01 $\pm$ 1.24 | 4.22 $\pm$ 0.36 | 0.34 $\pm$ 0.22  | 0.40 $\pm$ 0.11 | 1.96 $\pm$ 0.20 | 2.67 $\pm$ 0.14  | 27.03 $\pm$ 1.99 |
| ORG                                              | 44.66 $\pm$ 1.80 | 3.23 $\pm$ 0.07 | 4.57 $\pm$ 0.15 | 0.29 $\pm$ 0.11  | 0.45 $\pm$ 0.08 | 2.11 $\pm$ 0.27 | 2.81 $\pm$ 1.02  | 28.70 $\pm$ 2.16 |
| CA                                               | 57.17 $\pm$ 4.53 | 3.54 $\pm$ 1.06 | 5.90 $\pm$ 0.72 | 0.49 $\pm$ 0.10  | 0.43 $\pm$ 0.19 | 2.47 $\pm$ 0.29 | 2.41 $\pm$ 1.66  | 39.08 $\pm$ 2.58 |
| Additional carbon stock (t C. ha <sup>-1</sup> ) |                  |                 |                 |                  |                 |                 |                  |                  |
| ORG                                              | 2.44 $\pm$ 1.38  | 0.23 $\pm$ 0.62 | 0.35 $\pm$ 0.19 | -0.05 $\pm$ 0.12 | 0.05 $\pm$ 0.07 | 0.15 $\pm$ 0.17 | 0.14 $\pm$ 0.52  | 1.67 $\pm$ 1.63  |
| CA                                               | 14.95 $\pm$ 2.49 | 0.54 $\pm$ 0.82 | 1.68 $\pm$ 0.40 | 0.16 $\pm$ 0.12  | 0.03 $\pm$ 0.11 | 0.51 $\pm$ 0.18 | -0.26 $\pm$ 0.83 | 12.05 $\pm$ 1.47 |

**Table S5:** Mean physico-chemical characteristics of PROs added to QualiAgro between 1998 and 2011.

| Organic amendments | Corg<br>(g.kg <sup>-1</sup> MS) | Norg<br>(g.kg <sup>-1</sup> MS) | C/N            | ISMO<br>(% Corg) |
|--------------------|---------------------------------|---------------------------------|----------------|------------------|
| MSW                | 310 $\pm$ 45                    | 17.0 $\pm$ 2.0                  | 18.5 $\pm$ 4.1 | 49.0 $\pm$ 13.0  |
| FYM                | 324 $\pm$ 67                    | 21.0 $\pm$ 3.0                  | 15.5 $\pm$ 2.7 | 66.6 $\pm$ 7.0   |
| BIOW               | 211 $\pm$ 46                    | 16.9 $\pm$ 4.1                  | 12.6 $\pm$ 1.6 | 75.5 $\pm$ 6.3   |

**Fig. S1:** C/N ratios of cPOM and fPOM fractions in agricultural practices at La Cage and QualiAgro. Mean  $\pm$  standard deviation of 4 replicates. Letters represent significant differences between agricultural practices.

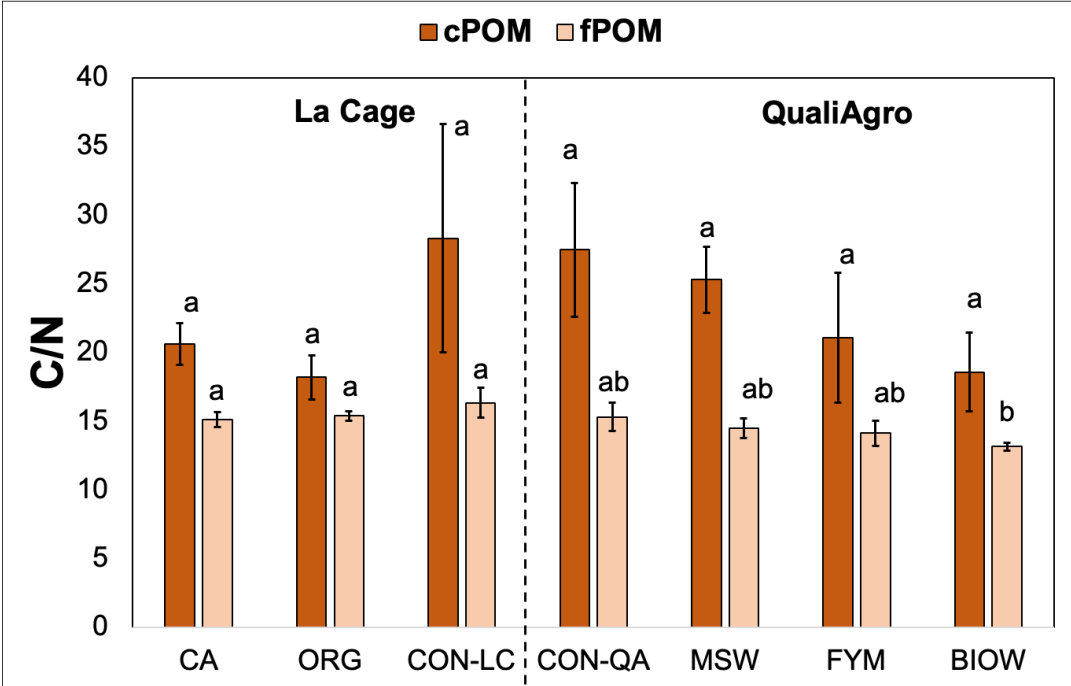

Supplement: Supplementary file 1 [file soil-10-533-2024-supplement.pdf]
